# Supplementary material
Source: PubMed Central journal article supplement (PMC8758516)
Supplement: NIHMS1738717-supplement-1738717_OR_1.pdf [file NIHMS1738717-supplement-1738717_OR_1.pdf]

**Online Resource 1**

Zoledronic Acid and Bone Health in Older Adults with Cognitive Impairment

Bryce M. Churilla, BS<sup>a</sup>, Subashan Perera, PhD<sup>a,b</sup>, Susan L. Greenspan, MD<sup>a,c</sup>, Neil M. Resnick, MD<sup>a</sup>, Mary P. Kotlarczyk, PhD<sup>a</sup>

<sup>a</sup>Division of Geriatric Medicine, Department of Medicine, University of Pittsburgh, Pittsburgh PA

<sup>b</sup>Department of Biostatistics, University of Pittsburgh, Pittsburgh PA

<sup>c</sup>Division of Endocrinology and Metabolism, Department of Medicine, University of Pittsburgh, Pittsburgh PA

Corresponding Author: Mary P. Kotlarczyk, PhD; mpk38@pitt.edu

Supplemental Table 1: Effect of Zoledronic Acid on Bone Health Outcomes

| Outcome                          | Cognitively Impaired      |                   |                          |                 | Cognitively Unimpaired    |                   |                          |                 | Differential Treatment Effect<br><i>p</i> -Value |
|----------------------------------|---------------------------|-------------------|--------------------------|-----------------|---------------------------|-------------------|--------------------------|-----------------|--------------------------------------------------|
|                                  | Zoledronic Acid Mean ± SD | Placebo Mean ± SD | Adjusted Difference ± SE | <i>p</i> -Value | Zoledronic Acid Mean ± SD | Placebo Mean ± SD | Adjusted Difference ± SE | <i>p</i> -Value |                                                  |
| Lumbar spine BMD percent change: |                           |                   |                          |                 |                           |                   |                          |                 |                                                  |
| 6 months                         | 1.6±3.2                   | 0.1±2.2           | 1.5±1.2                  | 0.198           | 2.3±3.7                   | 0.7±3.2           | 1.6±0.7                  | 0.017           | 0.946                                            |
| 12 months                        | 2.7±4.4                   | 0.2±2.6           | 1.9±1.2                  | 0.117           | 3.2±3.8                   | 1.4±4.5           | 1.8±0.7                  | 0.009           | 0.931                                            |
| Total hip BMD percent change:    |                           |                   |                          |                 |                           |                   |                          |                 |                                                  |
| 6 months                         | 2.0±3.4                   | -1.2±3.7          | 3.2±1.2                  | 0.008           | 1.6±3.9                   | 0.2±2.7           | 1.4±0.7                  | 0.046           | 0.172                                            |
| 12 months                        | 3.7±5.1                   | -0.3±3.8          | 4.3±1.3                  | <.001           | 2.6±3.8                   | -0.6±3.6          | 2.8±0.7                  | <.001           | 0.321                                            |

|                                  |            |           |            |       |            |            |            |       |       |
|----------------------------------|------------|-----------|------------|-------|------------|------------|------------|-------|-------|
| Femoral neck BMD percent change: |            |           |            |       |            |            |            |       |       |
| 6 months                         | 3.5±4.3    | 0.9±4.0   | 2.2±1.8    | 0.209 | 2.1±6.0    | 0.6±5.1    | 1.3±1.0    | 0.178 | 0.661 |
| 12 months                        | 3.7±5.8    | -1.3±5.5  | 5.3±1.9    | 0.005 | 2.0±6.1    | -1.3±5.2   | 3.0±1.0    | 0.004 | 0.284 |
| CTX change (nmol/L BCE):         |            |           |            |       |            |            |            |       |       |
| 6 months                         | -0.10±0.13 | 0.04±0.20 | -0.17±0.05 | 0.001 | -0.20±0.19 | 0.06±0.18  | -0.24±0.03 | <.001 | 0.211 |
| 12 months                        | -0.04±0.10 | 0.01±0.16 | -0.07±0.05 | 0.182 | -0.12±0.20 | 0.09±0.22  | -0.18±0.03 | <.001 | 0.085 |
| P1NP change (µg/L):              |            |           |            |       |            |            |            |       |       |
| 6 months                         | -24.0±22.6 | -0.1±15.7 | -20.1±4.9  | <.001 | -24.2±25.6 | -1.1±18.9  | -22.4±2.8  | <.001 | 0.686 |
| 12 months                        | -19.4±19.7 | -9.1±12.1 | -6.3±5.0   | 0.212 | -22.7±28.1 | -10.0±25.5 | -12.1±2.8  | <.001 | 0.318 |

SD = Standard deviation, SE = Standard error, BMD= Bone mineral density, CTX = C telopeptide crosslinks type I collagen, PINP = N-terminal propeptide type I procollagen
