# Supplementary material
Source: PubMed Central journal article supplement (PMC8758516)
Supplement: NIHMS1738717-supplement-1738717_OR_2.pdf [file NIHMS1738717-supplement-1738717_OR_2.pdf]

## Online Resource 2

### Zoledronic Acid and Bone Health in Older Adults with Cognitive Impairment

Bryce M. Churilla, BS<sup>a</sup>, Subashan Perera, PhD<sup>a,b</sup>, Susan L. Greenspan, MD<sup>a,c</sup>, Neil M. Resnick, MD<sup>a</sup>, Mary P. Kotlarczyk, PhD<sup>a</sup>

<sup>a</sup>Division of Geriatric Medicine, Department of Medicine, University of Pittsburgh, Pittsburgh PA

<sup>b</sup>Department of Biostatistics, University of Pittsburgh, Pittsburgh PA

<sup>c</sup>Division of Endocrinology and Metabolism, Department of Medicine, University of Pittsburgh, Pittsburgh PA

Corresponding Author: Mary P. Kotlarczyk, PhD; mpk38@pitt.edu

Supplemental Table 2: Number and Percentage of Distinct Women with Adverse Events or Dropped Out

| Event Type                  | Cognitively Impaired     |                  | Cognitively Unimpaired   |                  |
|-----------------------------|--------------------------|------------------|--------------------------|------------------|
|                             | Zoledronic Acid<br>N (%) | Placebo<br>N (%) | Zoledronic Acid<br>N (%) | Placebo<br>N (%) |
| Any adverse event           | 20 (95.2)                | 19 (86.4)        | 63 (94.0)                | 63 (91.3)        |
| Serious adverse event       | 10 (47.6)                | 7 (31.8)         | 30 (44.8)                | 33 (47.8)        |
| Expected side effects*      | 11 (52.4)                | 8 (36.4)         | 26 (38.8)                | 24 (34.8)        |
| Falls                       | 15 (71.4)                | 10 (45.5)        | 36 (53.7)                | 29 (42.0)        |
| Fractures                   | 1 (4.8)                  | 1 (4.5)          | 9 (13.4)                 | 5 (7.2)          |
| Death                       | 3 (14.3)                 | 1 (4.5)          | 3 (4.5)                  | 3 (4.3)          |
| Renal and urinary disorders | 2 (9.5)                  | 7 (31.8)         | 10 (14.9)                | 14 (20.3)        |
| Dropped out                 | 1 (4.8)                  | 1 (4.5)          | 4 (6.0)                  | 3 (4.3)          |

\* Pyrexia, myalgia, influenza, influenza-like symptoms, headache, arthralgia, fatigue, diarrhea, nausea, malaise, weakness or musculoskeletal pain
